1 Protocol ARTICLE

2 **iSupport-J, the Japanese version of an internet-based self-**  
3 **learning and psychological assessment program for dementia**  
4 **caregivers: study protocol for a randomized, waiting-list**  
5 **controlled study.**

6 Shingo Yamashita<sup>1</sup>, Yuma Yokoi<sup>1</sup>, Makoto Matsui<sup>1</sup>, Kazumi Nozaki<sup>1</sup>, Chinatsu Fujimaki<sup>1</sup>, Ayumu Wada<sup>1</sup>,  
7 Naoya Iwata<sup>1</sup> Norio Sugawara<sup>2</sup>, Yoshie Omachi<sup>1</sup>

8  
9 1 National Center of Neurology and Psychiatry, 4-1-1 Ogawahigashi-Cho, Kodaira, Tokyo 187–8551, Japan.

10 2 Department of Psychiatry, Dokkyo Medical University School of Medicine, 880 Kitakobayashi, Mibu,  
11 Tochigi 321–0293, Japan.

12 Correspondence: Shingo Yamashita

13 National Center of Neurology and Psychiatry, 4-1-1 Ogawahigashi-Cho, Kodaira, Tokyo 187–8551,  
14 Japan.Tel: +81-42-341-2712 (extension: 3114)

15 Fax: +81-42-344-6745

16 Email:s-yamashita@ncnp.go.jp

17

18 Number of tables: 1

19 Number of figures: 0

20

21 **Abstract:**

22 **Background:** The number of people with dementia in Japan will estimate to increase to roughly 20% of  
23 those aged 65 and over (approximately 7 million people) by 2025. Around the world, the number of people  
24 with dementia is increasing by 7.7 million per year, and caregivers' depression, stress, social isolation, and  
25 sleep disorders due to the burden of caregiving are also increasing. Economic losses worldwide due to  
26 physical and mental health problems of dementia caregivers, reduced work hours due to caregiving, and job  
27 loss are estimated to be \$252 billion in 2010. In addition, the risk of abuse against the caregiver increases as  
28 the caregiver is affected by physical and mental illness. Psychosocial interventions such as cognitive  
29 behavioral therapy have reportedly reduced caregivers' mental distress and improved their health. Since  
30 caregivers have significant time and physical limitations due to caregiving, it is promising that interventions  
31 using the internet, which have few limitations in terms of location and time, will be helpful, along with its low  
32 cost.

33 **Methods:** This is a two-arm, randomized, waitlist-controlled trial. Participants will be randomized with a 1:1  
34 ratio to either the immediate or late access group. The early intervention group will be able to use iSupport  
35 for three months, followed by allocation and follow-ups until six months. In the waitlist group, iSupport can be  
36 available for three months from the end of the Month 3 evaluation. Scheduled evaluation periods are Months  
37 1, 3, and 6.

38 **Discussion:** We plan to begin recruiting for the trial in January 2021. We plan to finish the inclusion by  
39 June 2021 and complete all data collection by December 2021. Once all data collection is complete, we plan  
40 to analyze the data by April 2022; we aim to publish the results in a manuscript by the end of 2022.

41  
42 **Trial Registration:** UMIN-CTR, UMIN000042957, registered on January 9, 2021.

43

44 **Keywords:**

45 iSupport ; family caregiver ; dementia ; internet-based intervention ; RCT

46

## 47 **Background**

48 The elderly population is growing worldwide, and the number of people aged 65 and over will likely reach  
49 36.7 million by 2025 [1]. Also, in Japan, one of the most aged countries, the number of patients with  
50 dementia will reportedly increase to 20% of those aged 65 and over (7 million people) by 2025 [2]. Globally,  
51 the number of patients with dementia worldwide was estimated to be 46.8 million in 2015 [3]. Furthermore,  
52 the number will assumably double every 20 years, rising to 74.7 million by 2030 and 131.5 million by  
53 2050[3].

54 Family members and other informal caregivers are primarily responsible for caring for people with dementia,  
55 especially in developing countries or countries characterized by familial practices. In Japan, informal care  
56 accounts for 70% of the total care provided, including 54% provided by family members living with the family,  
57 partly due to familial practices[4].

58 Caring for a person with dementia requires much care, from money management to bathing and diaper  
59 changing, which are both mentally and physically taxing for the caregivers. Therefore, they are at high risk of  
60 developing mental disorders such as depression, anxiety, and various physical diseases [5–7]. Furthermore,  
61 depression and anxiety of caregivers are associated with abuse against caregivers [8], and reducing  
62 depression and anxiety of caregivers is considered helpful for both patients with dementia and caregivers.

63 Psychosocial interventions to help caregivers cope with challenging behaviors and stressful situations,  
64 communicate with people with dementia, and improve their ability to seek support from others may be  
65 effective in improving caregivers' mental health and well-being [6,9-10]. Likewise, educating caregivers  
66 about the symptoms of dementia, how it progresses, how to control the symptoms, and how to use social  
67 resources is believed to reduce depressive symptoms and the sense of the burden of caregivers, and  
68 education for caregivers may be positive in maintaining the mental health of caregivers [11].

69 Additionally, psychological interventions such as cognitive-behavioral therapy for caregivers have been  
70 reported to reduce the mental distress of caregivers, such as anxiety and depression, and improve their  
71 health status.

72 Caregivers have significant time and physical constraints due to caregiving, interventions using the internet,  
73 which has fewer location and time constraints, are expected to be beneficial and inexpensive. In addition, the  
74 number of caregivers who have access to face-to-face interventions is limited due to reluctance and  
75 prejudice against asking non-family members to take care of family members.

76 For the abovementioned reasons, internet interventions are considered reasonable and supportive for  
77 caregivers in burden. In Japan, many people, including the elderly, use the internet, and we can intervene  
78 with caregivers via the internet, even if they are aged spouses.

79 A meta-analysis of RCTs(Randomized controlled trials) of Internet-based support interventions for dementia  
80 caregivers found that the interventions predominantly improved depressive symptoms and perceived stress  
81 and improved anxiety and caregiver self-efficacy. Alternatively, there were no significant improvements in the  
82 caregiver burden, coping ability, caregiver response to challenging behavior, or quality of life [12–15].

83 The World Health Organization(WHO) recognizes dementia as a public health priority[16]. In May 2017, the  
84 World Health Assembly endorsed the Global action plan on the public health response to dementia 2017–  
85 2025 [17]. Support for dementia caregivers is one of the main goals of the action plan.

86 Therefore WHO has developed iSupport, an online knowledge/skills training program aimed at improving the  
87 caregiver's mental health and coping skills, with the help of international experts. iSupport expectedly  
88 improves caregivers' mental health and coping skills through relaxation skills, cognitive restructuring, and  
89 problem-solving thinking using cognitive behavioral therapy techniques.

90 In Japan, the Comprehensive Strategy for Dementia Policy Promotion (the Orange Plan) has been in place  
91 since 2012 as a policy for the aging society. However, it was revised in 2017 (the New Orange Plan)[18] to

92 create a society where the elderly with dementia can live independently. The plan calls for promoting efforts  
93 to reduce the mental and physical burdens of family members and other caregivers, R&D of nursing care  
94 models, and disseminating the results.

95 In the New Orange Plan, caregiver support is one of the main pillars of promoting dementia-friendly  
96 communities, and we decided to introduce iSupport in Japan. In doing so, we followed the WHO adaptation  
97 guide and translated it into Japanese according to the Japanese cultural background. With the cooperation  
98 of the Association of People with Dementia and Their Families, a dementia family association in Japan, and  
99 nursing care specialists, an open-label, uncontrolled study was conducted to evaluate the Japanese version  
100 of the iSupport (iSupport-J) and the Psychological Evaluation and Questionnaire (electronic patient-reported  
101 outcome; ePRO) system. We surveyed the ease of understanding and usage of iSupport-J and the ePRO  
102 system and made changes to the presentation and system.

103 In this paper, we describe the design of an RCT to assess the effectiveness of iSupport-J, the Japanese  
104 version of iSupport.

105

## 106 **Methods**

### 107 ***Study Design***

108 This study is a two-arm, randomized, waitlist-controlled trial.

109 The first thing after enrollment is to randomize eligible family caregivers to Group A (initial intervention  
110 group) or Group B(waitlist control group). Group A will be able to access iSupport for three months, followed  
111 by the randomization immediately. On the other hand, Group B will be able to access iSupport after three  
112 months waitlist term (see Figure 1). Participants in the low-burden group with low CES-D or ZBI scores  
113 during the screening are not eligible for the study but can still use iSupport as Group C (reference group).

114 The study will follow the Consolidation Standards of Reporting Trials (CONSORT) guidelines [19].

115

116 Figure. Schedule of iSupport intervention study.

|                                         | STUDY PERIOD       |                |                 |                |                |
|-----------------------------------------|--------------------|----------------|-----------------|----------------|----------------|
|                                         | Enrolme<br>nt      | Allocatio<br>n | Post-allocation |                | Close-<br>out  |
|                                         | <b>TIMEPOINT**</b> | <b>-2-week</b> | <b>0</b>        | <b>1-month</b> | <b>3-month</b> |
| <b>ENROLLMENT:</b>                      |                    |                |                 |                |                |
| Eligibility screen                      | X                  |                |                 |                |                |
| Informed consent                        | X                  |                |                 |                |                |
| Allocation                              |                    | X              |                 |                |                |
| <b>INTERVENTIONS (iSupport-J):</b>      |                    |                |                 |                |                |
| <i>Group A [initial access group]</i>   |                    |                | X               | X              |                |
| <i>Group B [waitlist control group]</i> |                    |                |                 |                | X              |
| <i>Group C [reference group]</i>        |                    |                | X               | X              |                |
| <b>ASSESSMENTS:</b>                     |                    |                |                 |                |                |
| Baseline Characteristics                | X                  |                |                 |                |                |
| J-ZBI                                   | X                  |                | X               | X              | X              |
| CES-D                                   | X                  |                | X               | X              | X              |
| Positivity Criteria                     | X                  |                | X               | X              | X              |
| PHQ-9                                   | X                  |                | X               | X              | X              |
| GAD-7                                   | X                  |                | X               | X              | X              |
| ADQ                                     | X                  |                | X               | X              | X              |
| EQ-5D                                   | X                  |                | X               | X              | X              |
| CSQ-8                                   |                    |                | X*              | X*             | X              |
| <b>Exploratory endpoints:</b>           |                    |                |                 |                |                |
| Frequency/operation time of iSupport-J  | X                  |                | X               | X              | X              |
| Change in circumstances of care         |                    |                |                 |                |                |
| <b>Safety:</b>                          |                    |                |                 |                |                |

| Adverse events |  |  |  |  |  |
|----------------|--|--|--|--|--|
|----------------|--|--|--|--|--|

117 \*Group A and GroupC only

118 J-ZBI: The Japanese version of Zarit Burden Interview

119 CES-D: The Center for Epidemiologic Studies Depression Scale

120 Positivity Criteria: A scale for the assessment of a sense of positivity towards caregiving for the elderly w  
121 ith dementia

122 PHQ-9: Patient Health Questionnaire

123 GAD-7: Generalized Anxiety Disorder -7

124 ADQ: Approaches to Dementia Questionnaire

125 EQ-5D: EuroQol 5-Dimension

126 CSQ-8: Client Satisfaction Questionnaire-8

## 127 ***Participants***

128 Participants are screened and included if they (1) are aged 18 years and older, (2) are self-reported

129 caregiver whose care recipient has been diagnosed with dementia, (3) are a person who has access to the

130 internet, (4) score 21 or more on the Japanese version of the Zarit Burden Interview (J-ZBI) [20–21], (5)

131 score four or more the Japanese version of the Center for Epidemiological Studies Depression (CES-D)

132 scale[22-23]. Participants are excluded from the study if they (1) score 26 or more on the CES-D scale, (2)

133 score 15 or more on the Japanese version of the Generalized Anxiety Disorder-7 (GAD-7) scale [24–25],

134 and (3) are judged inappropriate by the investigators. Besides, applicants with J-ZBI score of 20 or less and

135 CES-D score of 3 or less will not be included in the RCT but will be evaluated as a reference group (low-

136 burden group).

137

## 138 ***Randomization***



139 As soon as the iSupport-J office staff receives participants' inputs in the ePRO, randomization starts  
140 automatically using a computer, according to stratified allocation with two covariates: gender (male/female)  
141 and caregiver/recipient relationship (spouse/other).

142 Participants assigned to Groups A and C will begin the iSupport intervention immediately, while those  
143 assigned to Group B will receive the iSupport intervention after a 3-month waiting period.

144

## 145 **iSupport-J**

146 iSupport is based on the WHO's Mental Health Gap Action Programme's evidence-based guidelines for  
147 dementia caregivers. The contents comprise the following five chapters and a summary.

148 Module 1. Introduction to Dementia

149 Module 2. Being a Caregiver

150 Module 3. Caring for me

151 Module 4. Providing everyday care

152 Module 5. Dealing with Challenging Behaviors

153

154 Before the start of this trial, we created a Japanese version of iSupport (iSupport-J) per the guidelines of  
155 WHO. We checked the understandability of iSupport-J and the ease of use of ePRO through a pilot study  
156 (N=11). We made modifications to make it easier for the elderly and adapt it to Japanese culture and  
157 system. In addition, we also added audio and video guidance for relaxation and mindfulness meditation, as  
158 well as various pictures for proactive involvement.

159 User data stored in the personal information management system automatically links to the ePRO system.

160 The system is usable with a web browser and is guaranteed to work on all standard terminals (listed in

161 "Supported OS and Browsers").

162 The participants by themselves will register to participate in the study and register their personal information.

163 The iSupport-J Office will access the personal information registered by the participants and contact them as  
164 necessary.

165 Participants log in with an ePRO ID and password and answer psychological evaluations and questionnaires  
166 online or study via the iSupport-J. The iSupport-J Office will contact the participants according to the  
167 participants' status of log-ins, response to psychological evaluations and questionnaires, and achievements  
168 in the iSupport-J.

169

## 170 **Interventions**

171 Caregivers who wish to participate in the study will apply via the iSupport-J website. After registration in the  
172 iSupport-J system, the participants will answer the questionnaire with the ePRO system on the internet. The  
173 researcher will send the informed consent forms, explain the study over the phone if necessary, and obtain  
174 written consent. Those who meet the exclusion criteria will be dropped out and will get notified.

175 In case of participants with suspected severe depression (CES-D scale score of 26 or more) or anxiety  
176 (GAD-7 scale score of 15 or more), the iSupport-J Office recommends they see psychiatrists or get local  
177 mental health and welfare services.

178 Participants who meet the inclusion criteria and are eligible for random allocation will divide into Group A  
179 (initial intervention group) and Group B (waitlist control group).

180 Group A will engage in the iSupport-J for three months, and participants report psychological evaluations  
181 and questionnaires via the ePRO system at baseline (at the beginning of the intervention), one month, three  
182 months (at the end of the intervention), and six months (post-intervention period). Group B will wait for three  
183 months, and then they can use iSupport-J for three months. Items and timing of evaluations are as same as

184 Group B, at baseline, one month, three months (at the beginning of the intervention), and six months (at the  
185 end).

186 Participants who are ineligible for allocation but not excluded will be evaluated as Group C (reference  
187 group) according to the same schedule as Group A. However, the data in Group C will not be used for the  
188 primary analysis but for exploratory analyses.

189 During the iSupport-J intervention period, participants will self-learn at their convenience. However, if two  
190 or three weeks pass without logging in, the iSupport-J system will send a reminder email to the participants.  
191 When three weeks have passed without logging in to e-learning, the iSupport-J system will also contact the  
192 iSupport-J Office, and the iSupport-J Office will remind the participants by phone or email.

193 When it is time to conduct the psychological evaluation and questionnaire, the iSupport-J system will notify  
194 the participants. The allowance of the input period will be two weeks. Suppose the input by the participants  
195 has yet to be confirmed even after three days remain until the due date. In that case, the iSupport-J system  
196 will contact the iSupport-J Office, and the iSupport-J Office will remind the subject by phone or email.

197

## 198 **Outcome measures**

199 The Japanese version of the Zarit Burden Interview (J-ZBI: a scale that measures physical and  
200 psychological burdens and economic difficulties as caregiver burdens) is the 21-item version of the  
201 Dementia Caregiver Affirmation Scale (a scale for assessing a sense of positivity toward caregiving for the  
202 elderly with dementia)[26]. J-ZBI is the primary endpoint of this study. We also adapted the Japanese  
203 version of the Center for Epidemiological Studies Depression scale (CES-D Scale, a scale to measure the  
204 severity of depressive symptoms) and the Japanese version of the Generalized Anxiety Disorder-7  
205 scale(GAD-7 scale, a scale to measure anxiety)  
206 for evaluating caregivers' depression, affirmation, and anxiety.

207 Other endpoints will be caregivers' awareness of person-centered care, quality of life (QOL), and  
208 satisfaction with the application. We used each of the following scales: the Japanese version of the  
209 Approaches to Dementia Questionnaire [27-28](ADQ; evaluation of caregivers' mind and attitude of person-  
210 centered care), the Japanese version of the EuroQol 5-Dimension [29-30](EQ-5D; QOL rating scale), and  
211 the Client Satisfaction Questionnaire [31-32](CSQ-8J; a questionnaire for evaluating application satisfaction).  
212 In addition, evaluations include a questionnaire to survey changes in care status and use of social resources  
213 because of using the iSupport-J system and time spent using the iSupport-J system. We will scrutinize the  
214 program's implementation rate, completion rate, and usage time through the iSupport-J system.

215

## 216 **Sample size calculation**

217 Assuming an alpha of 0.05, a statistical power (1-beta) of 0.80 in a two-tailed test, and a standardized effect  
218 size of 0.33, considered the clinically meaningful difference in reducing the J-ZBI for the target population, 80  
219 subjects per group are the estimated minimum sample size. We planned to recruit 104 subjects per group,  
220 considering possible missing data and dropouts.

221

## 222 **Covariates**

223 Covariates regarding caregivers are age, gender, working status, number of hours per week for providing  
224 care, number of family caregivers, and the relationship between the caregiver and the cared-for person.  
225 Covariates about the cared-for person are the diagnosis of dementia, other medical histories, former  
226 hospitalization due to dementia, number of years since dementia, level of care required, level of support, and  
227 level of social resources they use. Although it may not be any covariate, we collect data about iSupport-J  
228 itself by following questions; "Where did you learn about iSupport-J?", "What are the good and bad points of  
229 iSupport-J?" and "how much do you learn by using iSupport-J or other media?".

230

## 231 **Statistical analysis**

232 Distribution of demographic variables (e.g., gender, age, relationship to the caregiver, duration of care) and  
233 reference values (J-ZBI, CES-D, GAD-7, ADQ, EQ-5D, CSQ-8J, CGS) of the subject population participating  
234 in this study will be summarized. Descriptive statistics will identify the attributes and trends of participants.

235 We will calculate frequencies and proportions for categorical variables, and for continuous-type variables, we  
236 will compute summary statistics for each intervention group (mean  $\pm$  standard deviation, median, minimum  
237 and maximum).

238 The analysis will be based on the intention-to-treat principle for whomever was randomized into either Group  
239 A or B. We will conduct a mixed model for repeated measures (MMRM) analysis to detect changes in J-ZBI,  
240 the 21-item version of the Dementia Caregiver Affirmation Scale, CES-D, GAD-7, values from baseline to the  
241 Month 3 visit. The MMRM model includes the fixed effects of group, time point (Months 1, 3, 6), group-by-  
242 time interaction, and baseline characteristics (gender, caregiver/recipient relationship). The primary analysis  
243 per protocol set will be a sensitivity analysis and all analyses of secondary outcomes. All analyses will be  
244 performed using SAS V.9.4.

245

246

## 247 **Interim analysis**

248 We plan an interim analyses of potential sample size increase and safety when the 80th participant finishes  
249 the Month 3 assessment. In principle, we will not suspend enrollment during the interim analysis unless the  
250 pace of enrollment is extremely higher than expected at the time of the interim analysis. Whether or not to  
251 conduct an unscheduled enrollment pause will be decided after discussion by the study team and the  
252 principal investigator.

253 The allocator will blind the allocation group to 80 cases in each group for interim analysis (labeling the  
254 groups in a manner that is not analogous to the group name, e.g., R group and L group) and provide the  
255 statistician with data from baseline to Month 3.

256 The statistician will evaluate the mean values of the background information at baseline for each group or  
257 the entire group and present the results to the principal investigator.

258 The statistician will also evaluate the mean values for each group or the entire group for information after  
259 the baseline that does not directly affect efficacy (continuation rate) and present the results to the principal  
260 investigator.

261 The same analysis as the primary analysis will be performed for efficacy, using the J-ZBI score at  
262 repeated time points (baseline, Month 1, and Month 3), group (early intervention group and waiting list  
263 group), age, relationship to the caregiver, self-reported hours of care per week, level of care required by the  
264 caregiver, and caregiver's mental health status. The MMRM estimation method uses the restricted maximum  
265 likelihood method (REML). In addition, the Kenward-Roger method is used to estimate the degrees of  
266 freedom. To identify the variance-covariance structure, we first estimate in Unstructured (UN). If there is no  
267 convergence, we estimate in Heterogeneous CS (CSH) and Compound Symmetry (CS) sequentially.  
268 However, no statistical tests are performed.

269

## 270 **Discussion**

271 Recognizing that supporting family and other informal caregivers is an important priority, the World Health  
272 Organization (WHO) created iSupport. iSupport is originally in English but now has been translated and  
273 adapted to local cultures in various countries, and several RCTs are evaluating its effectiveness.

274 In Japan, the care system for patients with dementia was based on the municipality deciding the  
275 necessary services based on the user's condition until 2000 when the Long-Term Care Insurance Law was

276 enacted. Users can now receive comprehensive healthcare and medical services from various entities. One  
277 of the objectives of iSupport is to enable the appropriate use of external resources. In Japan, there are  
278 relatively good one-stop services such as long-term care insurance, but the effectiveness of iSupport will be  
279 affected by whether it encourages appropriate use. We plan to investigate whether there are any changes in  
280 the usage of services before and after using iSupport.

281 Research on this iSupport worldwide starts to disseminate. The first RCT was conducted in India [33],  
282 followed by the Netherlands [34] and Portugal [35]. In India, the control group was education only; in the  
283 Netherlands, it was the waitlist group. Adaptations have also been made in Australia [36], Brazil [37],  
284 Switzerland [38] for future efficacy  
285 studies.

286 According to a report from India [39], of the 74 patients in the iSupport group, only 29 could complete the  
287 follow-up assessment after three months, and more than 60% dropped out.

288 Since we acknowledged a high probability of dropout if participants were allocated to the e-books and  
289 never able to use iSupport-J, we decided to conduct an RCT in Japan with an iSupport group and a waitlist  
290 group, as we did in the Netherlands.

291 In Japan, the system automatically send reminder emails at the end of 2 and 3 weeks to motivate people to  
292 engage in iSupport if they still need to log in to iSupport. Based on the results of this study in India, it was  
293 considered essential to work on lowering the dropout rate. There was a report that adding phone call  
294 contacts to email reminders and monetary incentives did increase follow-up rates[40], suggesting that direct  
295 phone calls are necessary in addition to email reminders. That reminder methods need to be modified  
296 slightly.

297 Finally, we would like to conclude by asserting that we have ensured the safety of our research. We  
298 decided to exclude participants who had depression or anxiety above a certain level. In such cases, the

299 medical personnel would call them and introduce them to the family associations for dementia in Japan and  
300 recommend that they visit a medical institution.

301

## 302 **Conclusions**

303 In this study, we plan to verify the effectiveness of iSupport. If this study confirms the effectiveness of  
304 iSupport, we plan to make it available to more people.

305

## 306 **Trial Status**

307 This study is currently recruiting participants.

308

## 309 **List of Abbreviations**

310 ADQ: Approaches to Dementia Questionnaire

311 CES-D: Center for Epidemiologic Study Depression Scale

312 CONSORT: Consolidation Standards of Reporting Trials

313 CSQ-8J : Client Satisfaction Questionnaire

314 EQ-5D: EuroQol 5-Dimension

315 GAD-7: Generalized Anxiety Disorder scale-7-item

316 GEE: Generalized estimating equations

317 RCT: Randomized controlled trial

318 T0: Pre measurement

319 T1: First follow-up (1month)

320 T2: Second follow-up (3months)

321 WHO: World Health Organization



322 ZBI: Zarit Burden Interview

323

## 324 **Ethics approval and consent to participate**

325 The local institutional review board has approved approved our reseach (National Center of Neurology and

326 Psychiatry Ethics Committee, A2020-030). The principal investigator, the research coordinator, or the

327 research assistant will be responsible for conducting the informed consent process with the study

328 participants. All subjects must give consent to participate in the trial. Any relevant changes in the study

329 protocol and the informed consent will be sent to the Institutional Review Board as a protocol amendment.

330 All the subjects' identities will be protected with a unique code that only the principal investigator can access.

331 Before starting the trial, the protocol was registered in UMIN-CTR (UMIN000042957).

332

## 333 **Consent for publication**

334 Not applicable

335

## 336 **Availability of data and material**

337 Not applicable.

338

## 339 **Competing interests**

340 The authors declare that they have no competing interests.

341

## 342 **Funding**

343 This research was supported by MHLW Research on Dementia Program Grant Number 19GB1002a and

344 Intramural Research Grant (30–3) for Neurological and Psychiatric Disorders of NCNP.

345

## 346 **Author contributions**

347 SY, YY, NS, and YO developed the design and methodology.

348 SY, YY, MM, KN, CF, AW, NI, NS, and YO created the Japanese version of iSupport. SY, YY, XX, NS, and

349 YO developed the analysis plan.

350 All authors contributed to drafting the article and read and approved the final manuscript.

351

## 352 **Acknowledgments**

353 The authors would like to thank WHO for permitting us to create the Japanese version of iSupport.

354 The authors would also like to thank the expert panel, the Association of People with Dementia and their

355 Families, and the Kodaira City government for cooperating in preparing the Japanese version of iSupport.

356

## 357 **References**

358 1. National Institute of Population and Social Security Research: Report on Japan's Future Population

359 Projections. 2017. [http://www.ipss.go.jp/ppzenkoku/j/zenkoku2017/pp29\\_ReportALL.pdf](http://www.ipss.go.jp/ppzenkoku/j/zenkoku2017/pp29_ReportALL.pdf).

360 Accessed February 3, 2021.

361 2. Cabinet Office, Government of Japan. White paper on aging society. 2017.

362 [https://www8.cao.go.jp/kourei/whitepaper/w-2017/zenbun/29pdf\\_index.html](https://www8.cao.go.jp/kourei/whitepaper/w-2017/zenbun/29pdf_index.html). (in Japanese).

363 Accessed February 3, 2021.

364 3. Alzheimer's Disease International : World Alzheimer Report. 2015. 10-45.

365 4. Ministry of Health, Labour and Welfare, Government of Japan. Overview of the 2019 National

366 Survey on Living Standards. 2019

367 <https://www.mhlw.go.jp/toukei/saikin/hw/k-tyosa/k-tyosa19/dl/05.pdf> (in Japanese)

368 Accessed February 3, 2021.

369 5. Kaddour L, Kishita N, Schaller A. A meta-analysis of low-intensity cognitive behavioral therapy-  
370 based interventions for dementia caregivers. *Int Psychogeriatrics* [Internet]. 2019 ;31(07):961-976.

371 Available from:

372 [https://www.cambridge.org/core/product/identifier/S1041610218001436/type/journal\\_article](https://www.cambridge.org/core/product/identifier/S1041610218001436/type/journal_article)

373 6. World Health Organization. Supporting Informal Caregivers of People Living With Dementia. 2015.

374 [https://www.who.int/mental\\_health/neurology/dementia/dementia\\_thematicbrief\\_informal\\_care.pdf](https://www.who.int/mental_health/neurology/dementia/dementia_thematicbrief_informal_care.pdf)

375 Accessed February 3, 2021

376 7. Givens JL, Mezzacappa C, Heeren T, Yaffe K, Fredman L. Depressive symptoms among dementia  
377 caregivers: Role of mediating factors. *Am J Geriatr Psychiatry*. 2014;22(5):481-488.

378 8. Cooper C, Blanchard M, Selwood A, Walker Z, Livingston G. Family carers' distress and abusive  
379 behaviour: Longitudinal study. *Br J Psychiatry*. 2010 Jun;196(6):480-485.

380 9. Ory MG, Hoffman RR 3rd, Yee JL, Tennstedt S, Schulz R. Prevalence and impact of caregiving: a  
381 detailed comparison between dementia and nondementia caregivers. *Gerontologist*. 1999

382 Apr;39(2):177-85.

383 10. Gilhooly KJ, Gilhooly MLM, Sullivan MP, McIntyre A, Wilson L, Harding E, et al. A meta-review of  
384 stress, coping and interventions in dementia and dementia caregiving. *BMC Geriatr*. 2016 May

385 18;16(1).

386 11. Terayama H, Sakurai H, Namioka N, Jaime R, Otakeguchi K, Fukasawa R, et al. Caregivers'  
387 education decreases depression symptoms and burden in caregivers of patients with dementia.

388 *Psychogeriatrics* [Internet]. 2018 Sep 1;18(5):327-33. Available from:

389 <https://doi.org/10.1111/psyg.12337>

- 390 12. Leng M, Zhao Y, Xiao H, Li C, Wang Z. Internet-Based Supportive Interventions for Family  
391 Caregivers of People With Dementia: Systematic Review and Meta-Analysis. *J Med Internet Res.*  
392 2020 Sep;22(9):e19468.
- 393 13. Boots LMM, de Vugt ME, van Knippenberg RJM, Kempen GIJM, Verhey FRJ. A systematic review  
394 of Internet-based supportive interventions for caregivers of patients with dementia. *Int J Geriatr*  
395 *Psychiatry.* 2014 Apr;29(4):331–44.
- 396 14. Parra-Vidales E, Soto-Pérez F, Perea-Bartolomé MV, Franco-Martín MA, Muñoz-Sánchez JL.  
397 Online interventions for caregivers of people with dementia: a systematic review. *Actas Esp*  
398 *Psiquiatr.* 2017 May;45(3):116–26.
- 399 15. Egan KJ, Pinto-Bruno AC, Bighelli I, Berg-Weger M, van Straten A, Albanese E, et al. Online  
400 Training and Support Programs Designed to Improve Mental Health and Reduce Burden Among  
401 Caregivers of People With Dementia: A Systematic Review. *J Am Med Dir Assoc.* 2018  
402 Mar;19(3):200-206.e1.
- 403 16. Dementia: A Public Health Priority. World Health Organization; 2012.  
404 [https://apps.who.int/iris/bitstream/handle/10665/75263/9789241564458\\_eng.pdf?sequence=1](https://apps.who.int/iris/bitstream/handle/10665/75263/9789241564458_eng.pdf?sequence=1)  
405 Accessed February 3, 2021.
- 406 17. Global Action Plan on the Public Health Response to Dementia: 2017-2025. World Health  
407 Organization;2017.  
408 <https://apps.who.int/iris/bitstream/handle/10665/259615/9789241513487-eng.pdf?sequence=1>  
409 Accessed February 3, 2021.
- 410 18. The Ministry of Health, Labor and Welfare, Government of Japan;2017.  
411 The Comprehensive Strategy for Dementia Policy Promotion (New Orange Plan)  
412 <https://www.mhlw.go.jp/file/06-Seisakujouhou-12300000-Roukenkyoku/nop101.pdf>

- 413 Accessed February 3, 2021.
- 414 19. Schulz K, Altman D, Moher D, CONSORT Group. CONSORT 2010 Statement: Updated guidelines  
415 for reporting parallel group randomised trials. BMC Med. 2010; 8:18 [doi: 10.1186/1741-7015-8-18]  
416 [Medline: 20334633]
- 417 20. Zarit S, Reever K, Bach-Peterson J. Relatives of the Impaired Elderly: Correlates of Feelings of  
418 Burden. Gerontologist. 1981 ;20:649–55.
- 419 21. Arai, Y. The Japanese version of Zarit Burden Interview (J-ZBI) and its short version (J -ZBI\_8).  
420 Nihon Rinsho. Japanese Journal of Clinical Medicine, 2004; 62(4), 45-50.
- 421 22. Radloff, L. S. The CES-D scale. Appl Psychol Meas, 1977; 1:385-401.
- 422 23. Satoru, S. Tatsuo, S. Toshinori, K. Masahiro, A. New Self-Rating Scales for Depression Clinical  
423 Psychiatry, 1985; 27(6), 717-723.
- 424 24. Williams, J. B. W. A Brief Measure for Assessing Generalized Anxiety Disorder: The GAD-7. 2006 ;  
425 <https://doi.org/10.1001/archinte.166.10.1092>
- 426 25. Muramatsu K, Miyaoka H, Ueshima K, Muramatsu Y, Fuse K, Yoshimine H, et al. Validation and  
427 utility of a Japanese version of the GAD-7. Jpn J Psychosom Med. 2010 .1;50.
- 428 26. Fuju, T. Tabei, Y. Shimamura, M. Yamagami, T. Factors influencing a sense of positivity towards  
429 caregiving designed exclusively for people who provide such care for elderly family members with  
430 dementia-A preliminary study to develop a scale for the assessment of a sense of positivity towards  
431 caregiving for the elderly with dementia-Bulletin of Institute for Public Welfare. 2015;12(1),1-14
- 432 27. Lintern.T. Quality in dementia care: Evaluating Staff attitude and behavior. PHD thesis. University Of  
433 Wales Bangor; 2001

- 434 28. Mizue, S.Yutaka, M.Dawn, B. Hajime, O.Masao, K. How quality of life indices reflect the behaviors of  
435 elderly people with dementia on dementia care mapping and the relationship among well-being, ill-  
436 being and the behavior category code, Japanese Journal of Geriatrics, 2009; 49(3),355-366
- 437 29. EuroQOL group. EuroQOL a new facility for the measurement of health – related quality of life,  
438 Health Policy, 1990; 16, 199-208
- 439 30. Ryota, I. Shinichi, N. Takamoto, U.Tetsuya, S.Taiki, S. Validity and responsiveness of the health  
440 utility measures Japanese version in health-related quality of life: Evaluation of the use of EuroQol 5-  
441 Dimension and the Health Utilities Index Mark 3, occupational therapy, 2010; 29(6),763-772
- 442 31. Attkisson, C. The Client Satisfaction Questionnaire (CSQ) Scales. In Measures for Clinical Practice:  
443 A Sourcebook; 1996
- 444 32. Hisateru, T. Hiroto, I. Reliability and Validity of The Japanese Version on Client Satisfaction  
445 Questionnaire, Clinical Psychiatry, 1999; 41(7),711-717
- 446 33. Mehta KM, Gallagher-Thompson D, Varghese M, Loganathan S, Baruah U, Seeher K, et al. iSupport,  
447 an online training and support program for caregivers of people with dementia: study protocol for a  
448 randomized controlled trial in India. *Trials*. 2018 ;19(1):271.
- 449 34. Pinto-Bruno AC, Pot AM, Kleiboer A, Dries R-M, van Straten A. An Online Minimally Guided  
450 Intervention to Support Family and Other Unpaid Carers of People With Dementia: Protocol for a  
451 Randomized Controlled Trial. *JMIR Res Protoc*. 2019 ;8(10):e14106.
- 452 35. Teles S, Ferreira A, Seeher K, Freel S, Paul C. Online training and support program (iSupport) for  
453 informal dementia caregivers: protocol for an intervention study in Portugal. *BMC Geriatr*.  
454 2020 ;20(1):10.

- 455 36. Xiao LD, McKechnie S, Jeffers L, De Bellis A, Beattie E, Low L-F, et al. Stakeholders' perspectives  
456 on adapting the World Health Organization iSupport for Dementia in Australia. *Dementia*. 2020;  
457 1471301220954675.
- 458 37. Oliveira D, Jacinto AF, Gratao ACM, Ottaviani AC, Ferreira CR, Monteiro DQ, et al. Translation and  
459 cultural adaptation of iSupport in Brazil. *Alzheimer's Dement*. 2020;16(S7).
- 460 38. Fiordelli M, Albanese E. Preparing the ground for the adaptation of iSupport in Switzerland.  
461 *Alzheimer's Dement*. 2020;16(S7):38915.
- 462 39. Baruah U, Varghese M, Loganathan S, Mehta K, Gallagher Thompson D, Zandi D, et al. A pilot  
463 randomized controlled trial on iSupport in India: Results on the use of the online program and its  
464 effectiveness. *Alzheimer's Dement*. 2020;16(S7):38912.
- 465 40. Muñoz RF, Leykin Y, Barrera AZ, Brown CH, Bunge EL. The impact of phone calls on follow-up  
466 rates in an online depression prevention study. *Internet Interv*. 2017 June 1;8:10–4.
